# Supplementary material for: A Higher Abundance of Actinomyces spp. in the Gut Is Associated with Spontaneous Preterm Birth
Source: MDPI journal article supplement (doi:10.3390/microorganisms11051171), 2023-04-29
Supplement: s1 [file s1]

Supplementary Table S1. Dietary and Nutrition comparison between mothers with preterm and term

| Item              | Preterm         | Term            | P value |
|-------------------|-----------------|-----------------|---------|
| Calories (Kcal)   | 1690.70 ± 92.81 | 1627.28 ± 38.28 | 0.586   |
| Protein (g)       | 64.96 ± 3.35    | 62.50 ± 1.45    | 0.576   |
| fat (g)           | 54.27 ± 3.16    | 51.98 ± 1.86    | 0.680   |
| Carbonhydrate (g) | 238.78± 16.10   | 230.77 ± 5.41   | 0.633   |
| Protein (%)       | 15.42 ± 0.57    | 15.39 ± 0.19    | 0.957   |
| fat (%)           | 27.70 ± 1.71    | 27.0 ± 0.59     | 0.711   |
| Carbonhydrate (%) | 53.04 ± 2.80    | 54.84 ± 0.89    | 0.514   |
| Vitamin A (µg)    | 682.26 ± 45.25  | 725.480 ± 23,13 | 0.401   |
| Vitamin D (µg)    | 4.69 ± 0.31     | 4.99 ± 0.17     | 0.405   |
| Vitamin E (mg)    | 7.13 ± 0.58     | 6.98 ± 0.27     | 0.851   |
| Vitamin B1 (mg)   | 0.99 ± 0.05     | 0.96 ± 0.02     | 0.668   |
| Vitamin B2 (mg)   | 1.37 ± 0.09     | 1.38 ± 0.04     | 0.930   |
| Niacin (mg)       | 15.32 ± 1.00    | 16.07 ± 0.46    | 0.587   |
| Vitamin B6 (mg)   | 1.20 ± 0.07     | 1.24 ± 0.03     | 0.687   |
| Vitamin B12 (µg)  | 3.98 ± 0.32     | 4.45 ± 0.17     | 0.352   |
| Vitamin C (mg)    | 124.03 ± 11.27  | 127.87 ± 4.04   | 0.757   |
| Fiber (g)         | 13.24 ± 0.91    | 13.43 ± 0.40    | 0.876   |
| Cholesterol (mg)  | 325.15 ± 28.67  | 271.71 ± 8.41   | 0.044   |
